# Supplementary material
Source: Royal Society of Chemistry journal article supplement (doi:10.1039/d6ta02783k)
Supplement: d6ta02783k1.pdf [file d6ta02783k1.pdf]

## Supporting Information

# First-Principles Insights into Dopant-Vacancy Interactions in Acceptor-Doped Perovskites

*Yoshikazu Kikuchi,<sup>1</sup> Takaya Fujisaki,<sup>2</sup> Tatsumi Ishihara,<sup>1,3</sup>*

*John Kilner,<sup>3,4</sup> Aleksandar Staykov<sup>1,3\*</sup>*

<sup>1</sup> Faculty of Engineering Department of Applied Chemistry, Kyushu University, 744  
Motooka, Nishi-ku, Fukuoka 819-0395, Japan

<sup>2</sup> Faculty of Materials for Energy, Shimane University, 1060, Nishikawatsu, Matsue, Shimane  
690-0823, Japan

<sup>3</sup> International Institute for Carbon-neutral Energy Research (WPI-I2CNER), Kyushu  
University, 744 Motooka, Nishi-ku, Fukuoka 819-0395, Japan

<sup>4</sup> Department of Materials, Imperial College London, London SW7 2AZ, U.K.

\* Corresponding author [alex@i2cner.kyushu-u.ac.jp](mailto:alex@i2cner.kyushu-u.ac.jp)

**Table S1:** Host structures and the dopant cations.

| Host material      | Dopant (A-site doping) |                  | Dopant (B-site doping) |                  |
|--------------------|------------------------|------------------|------------------------|------------------|
|                    | Group 1                | Group 2          | Group 1                | Group 2          |
| LaAlO <sub>3</sub> | Sr <sup>2+</sup>       | Ba <sup>2+</sup> | Mg <sup>2+</sup>       | Cu <sup>2+</sup> |
| LaGaO <sub>3</sub> | Sr <sup>2+</sup>       | Ba <sup>2+</sup> | Mg <sup>2+</sup>       | Cu <sup>2+</sup> |
| SrTiO <sub>3</sub> | Na <sup>+</sup>        | K <sup>+</sup>   | Sc <sup>3+</sup>       | Fe <sup>3+</sup> |

**Table S2:** Initial phase, supercell scaling factor, and k-point grid used for structural relaxation of each host material

| Host material              | Phase  | repetition | k-point grid |
|----------------------------|--------|------------|--------------|
| LaAlO <sub>3</sub> (800 K) | Pm3_m  | 2*2*4      | 4*4*2        |
| LaAlO <sub>3</sub> (0 K)   | R3_c   | ※          | 3*3*4        |
| LaGaO <sub>3</sub> (800 K) | R3_c   | ※          | 4*4*2        |
| LaGaO <sub>3</sub> (0 K)   | Pnma   | 2*2*1      | 3*3*4        |
| SrTiO <sub>3</sub> (800 K) | Pm3_m  | 2*2*4      | 4*4*2        |
| SrTiO <sub>3</sub> (0 K)   | I4/mcm | 2*2*1      | 3*3*4        |

**Figure S1:** Comparison of trends for STO with 80 and 320 atoms in the supercell and Sc without DFT+U correction and 3.0 eV Hubbard correction.

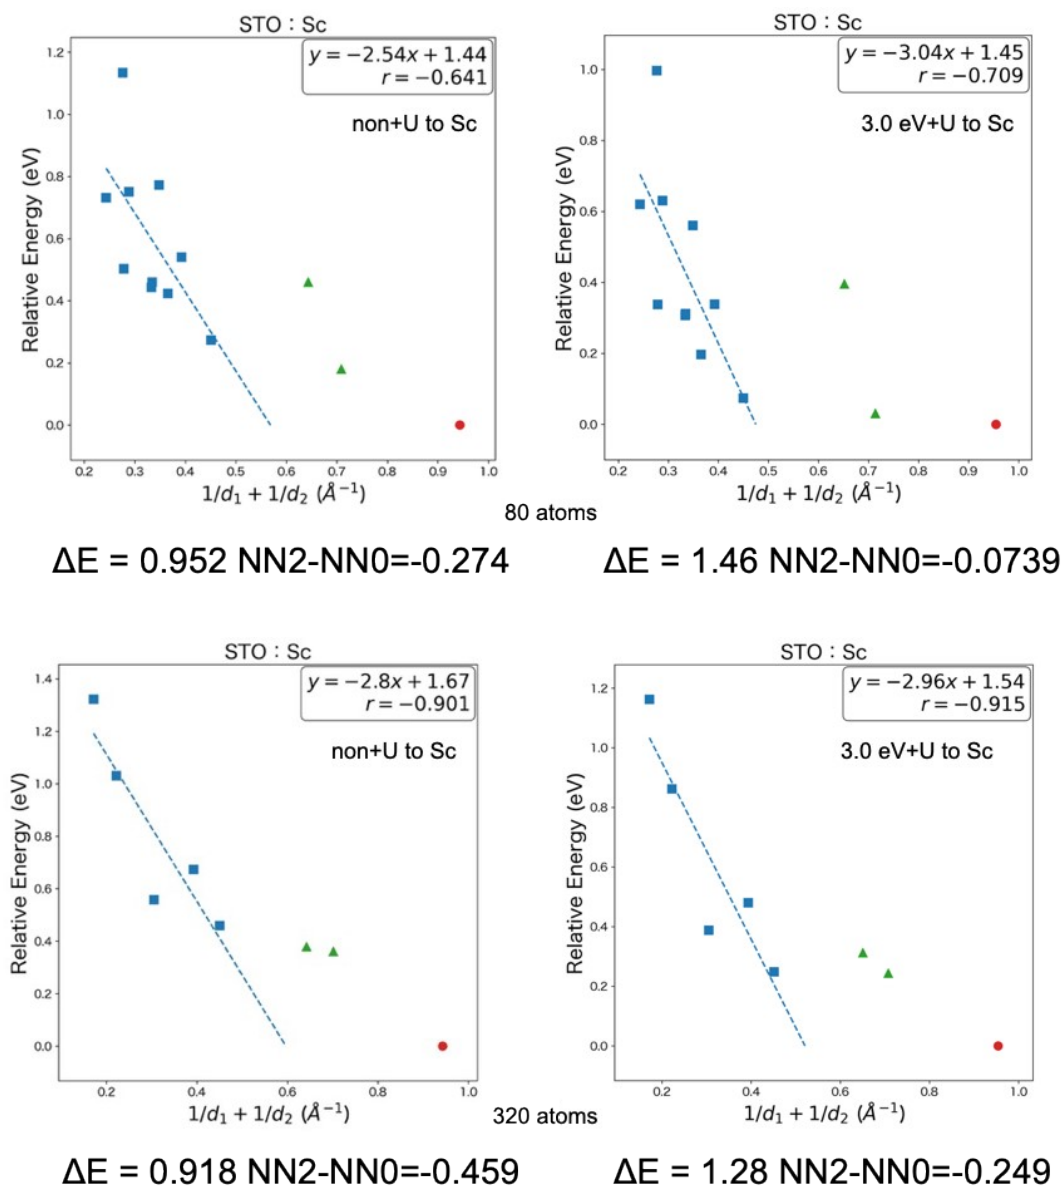

**Figure S2:** Comparison of trends for various lattices with 80 atoms in the supercell and between PBE (PBE+U where applicable) and HSE06.

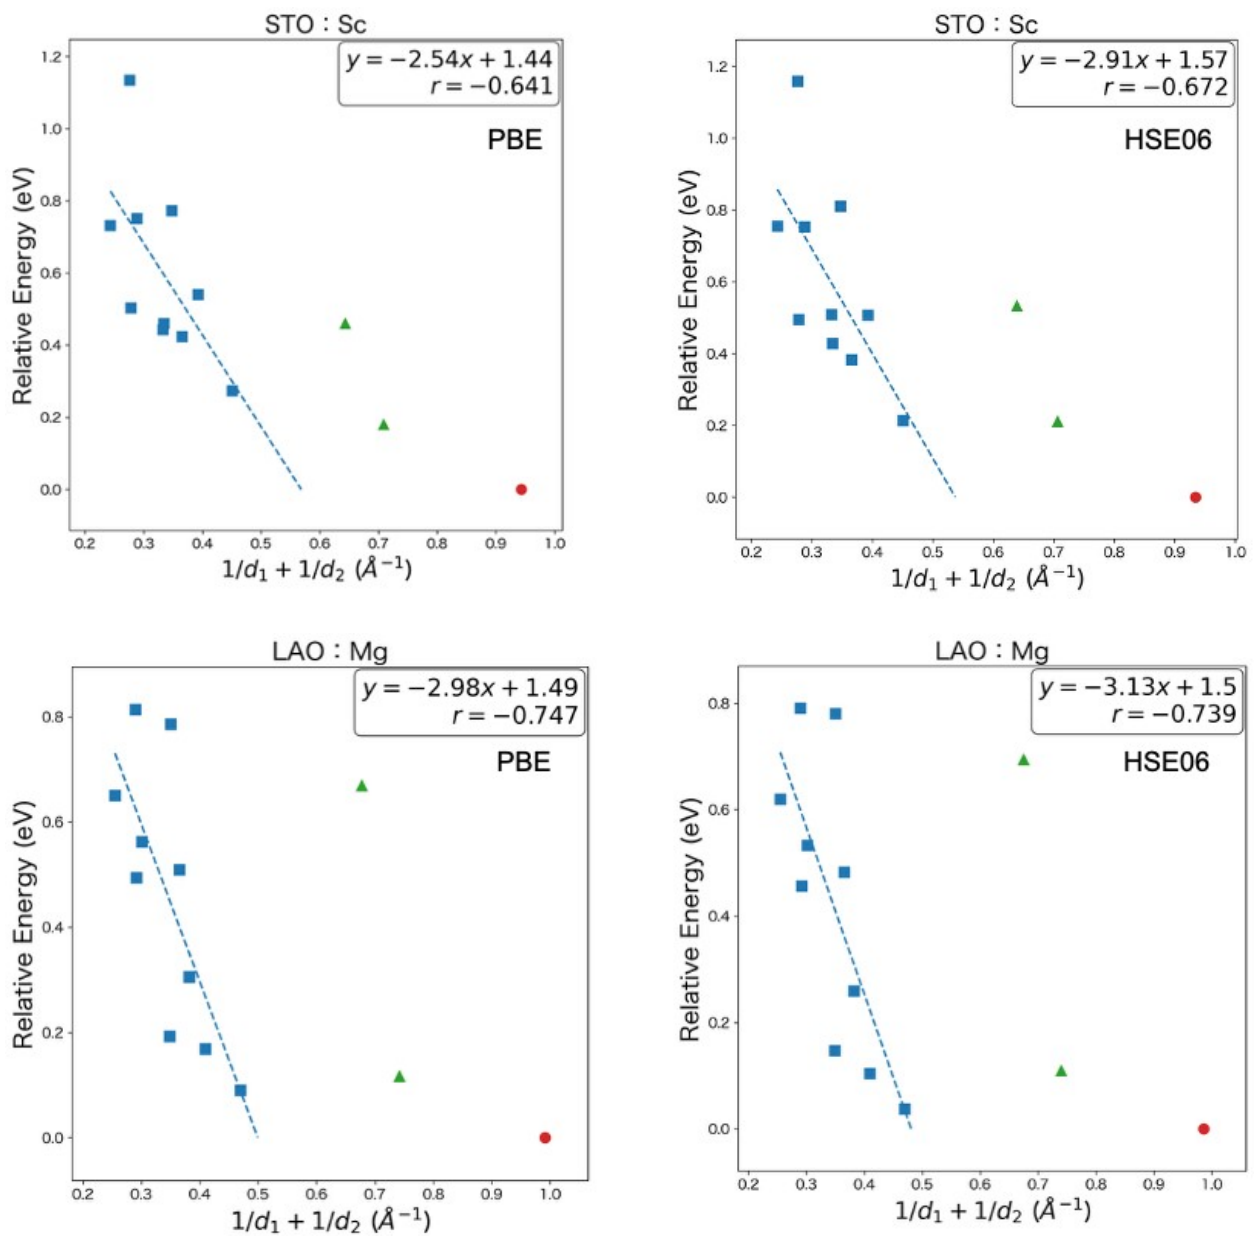

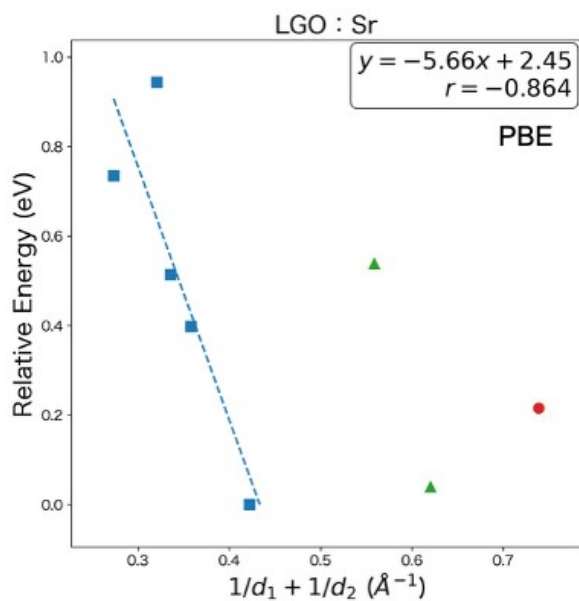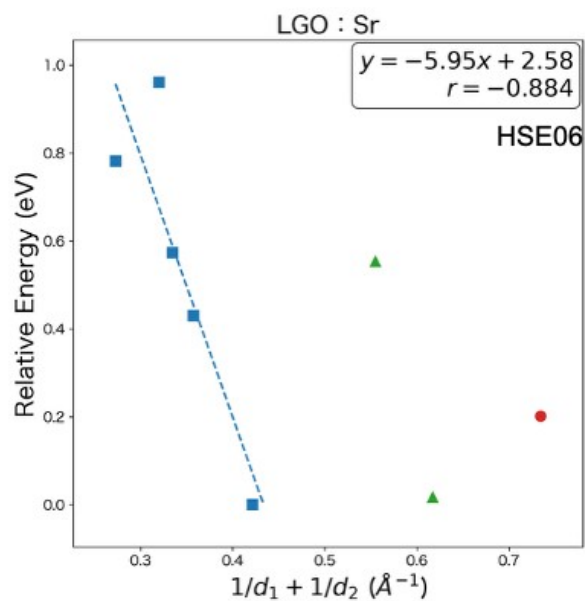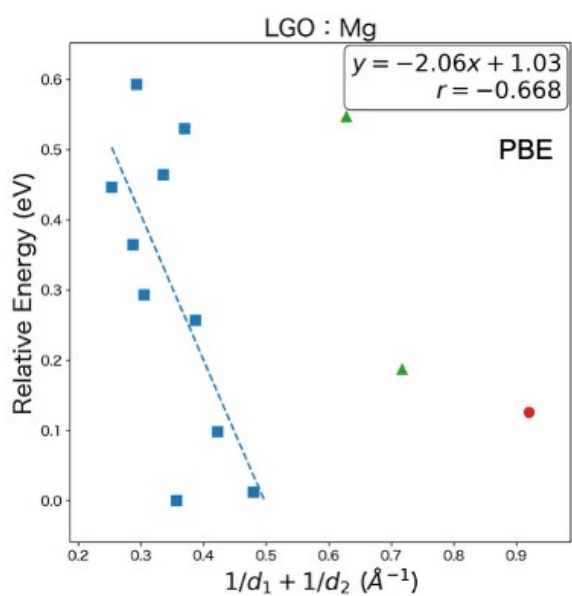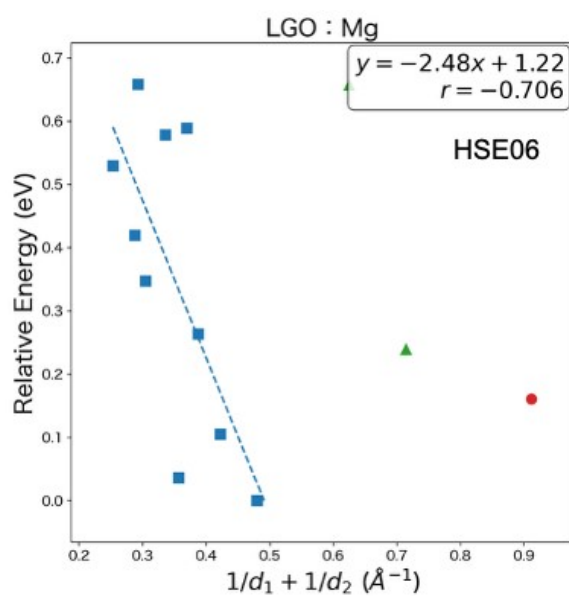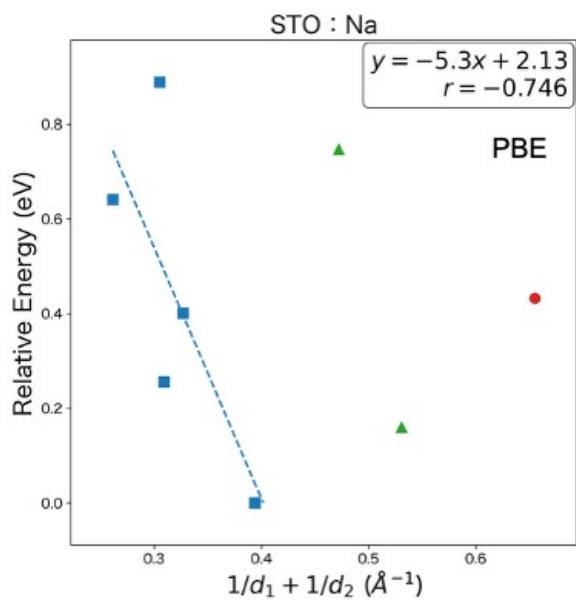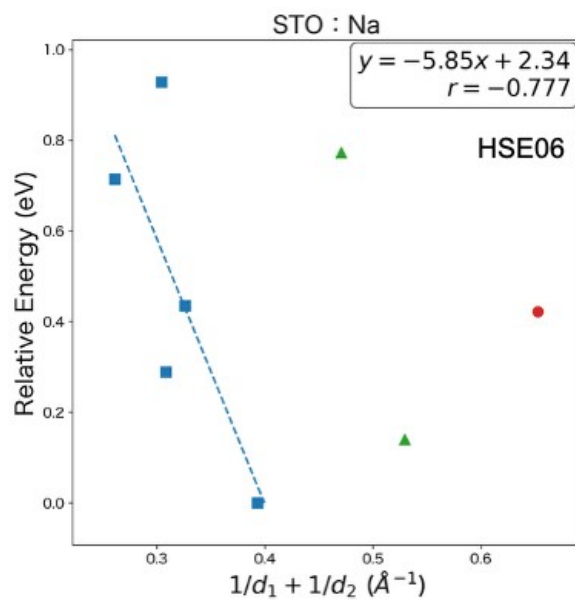

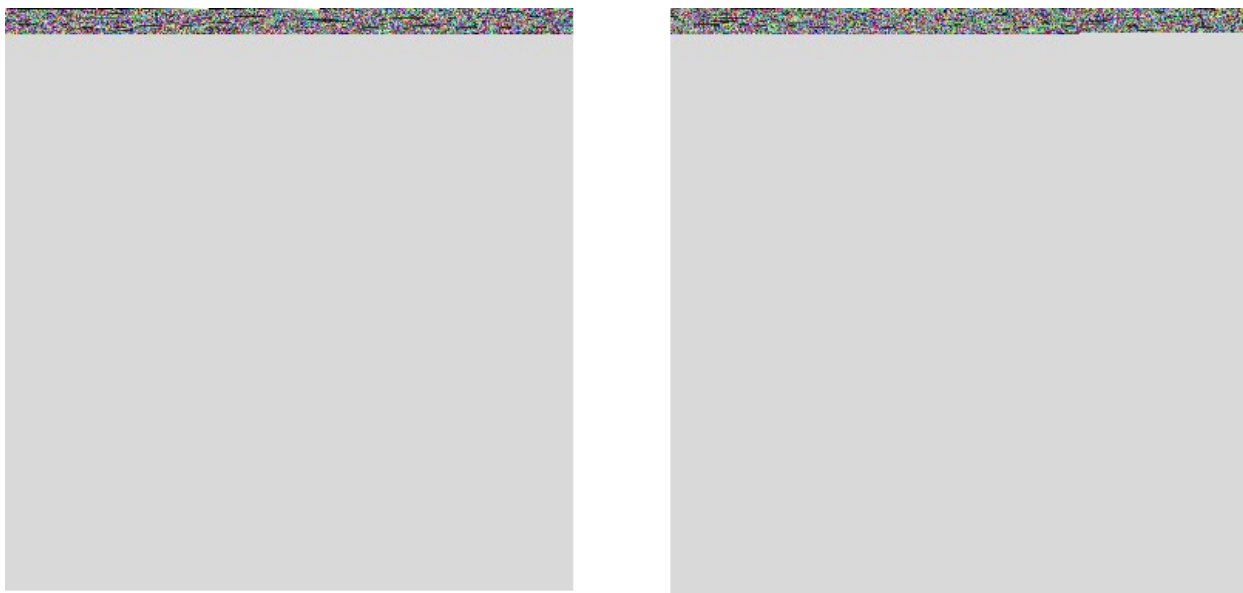

*0 temperature Stable Phases with 80 atoms in the supercell*

Figure S3 shows the relative energies of vacancy configurations plotted as functions of the Coulomb metric for Sr- or Mg-doped LaAlO<sub>3</sub>, Sr- or Mg-doped LaGaO<sub>3</sub>, and Na- or Sc-doped SrTiO<sub>3</sub> in the 80-atom supercells of the 0 K stable phase. For A-site-doped LGO and STO, two distinct NN2 configurations are present, corresponding to axial and equatorial arrangements.

a

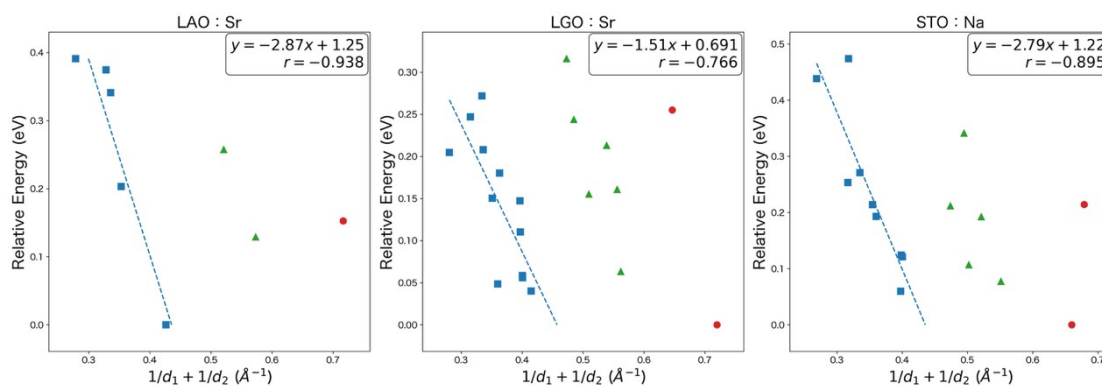

b

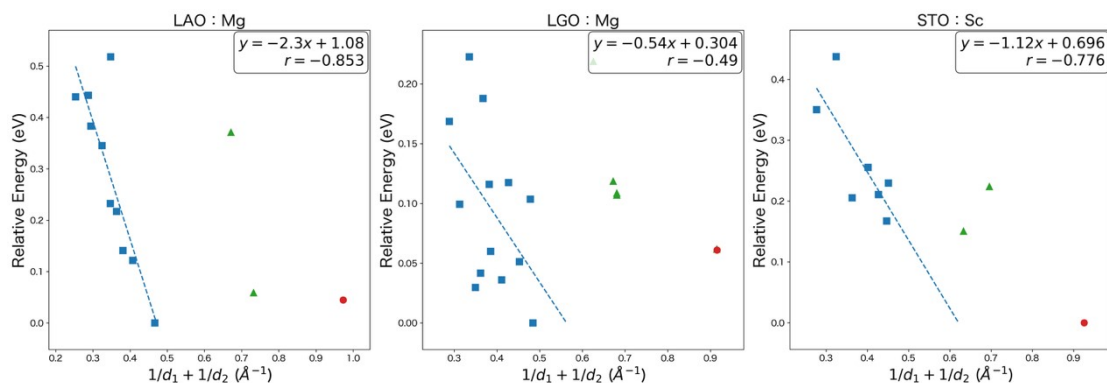

**Figure S3.** Relative energies of vacancy configurations plotted as functions of the Coulomb metric ( $1/d_1 + 1/d_2$ ) for the 80-atom supercells constructed from the most stable 0 K phase. (a) A-site doping; (b) B-site doping. Blue squares, green triangles, and red circles correspond to NN0, NN1, and NN2 configurations, respectively. The dotted line represents a linear fit to the NN0 data. The fitting equation and the corresponding correlation coefficient ( $r$ ) are given in the upper-right corner of each panel.

Overall, the results exhibit trends similar to those obtained for the 800 K stable phase, supporting the physical validity of the constrained structural relaxations employed in this work. For Mg-doped LaGaO<sub>3</sub>, however, the linear fit for the NN0 configurations is substantially weaker ( $|r| = -0.49$ ). We attribute this behavior primarily to the strong dependence of vacancy energies on whether the vacancy occupies an axial or equatorial position. Consistent with this interpretation, Gambino et al. reported a pronounced energy difference between axial and equatorial vacancy configurations in Mg-doped LGO.
